# Supplementary material for: Development, Optimization, Characterization, and Application of Electrochemical Biosensors for Detecting Nickel Ions in Food
Source: MDPI journal article supplement (doi:10.3390/bios11120519), 2021-12-16
Supplement: s1 [file s1]

## Article

# Development, Optimization, Characterization and Application of Electrochemical Biosensors for Detecting Nickel Ions in Food

Liliana Anchidin-Norocel <sup>1</sup>, Wesley K. Savage <sup>1,2,\*</sup>, Gheorghe Gutt <sup>3</sup>, Sonia Amariei <sup>3</sup>

<sup>1</sup> Faculty of Medicine and Biological Sciences, Stefan cel Mare University of Suceava, 720229 Suceava, Romania

<sup>2</sup> Integrated Center for Research, Development and Innovation in Advanced Materials, Nanotechnologies, and Distributed Systems for Fabrication and Control, Stefan cel Mare University of Suceava, 720229 Suceava, Romania;

<sup>3</sup> Faculty of Food Engineering, Stefan cel Mare University of Suceava, 720229 Suceava, Romania

\* Correspondence: wesley.savage@usm.ro

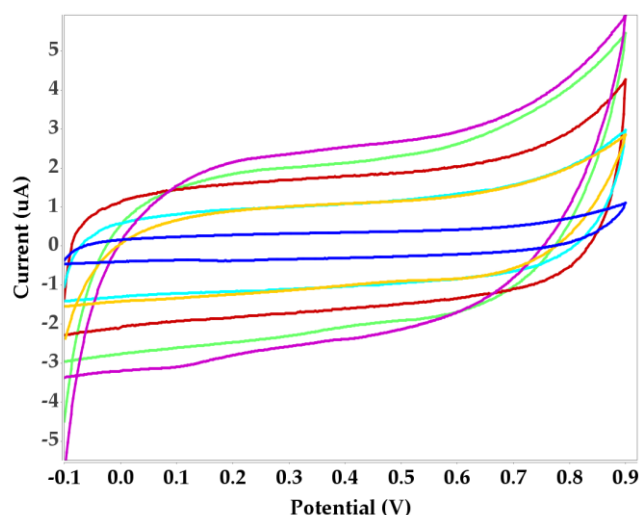

(a)

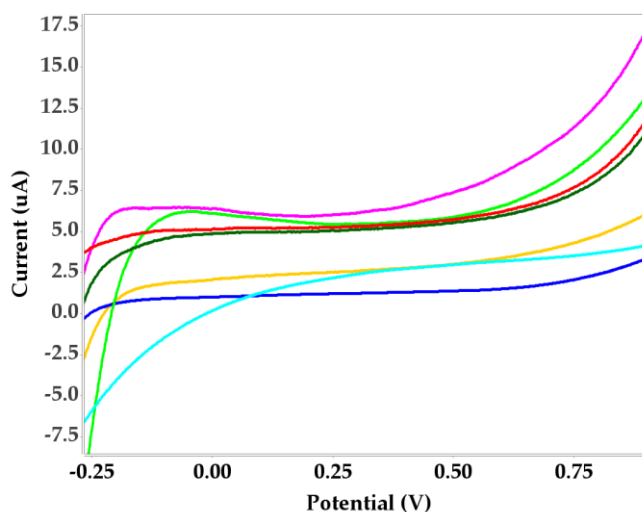

(d)

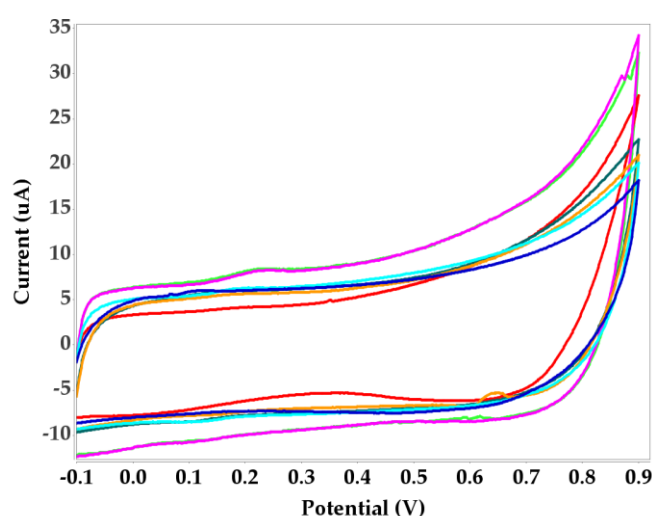

(b)

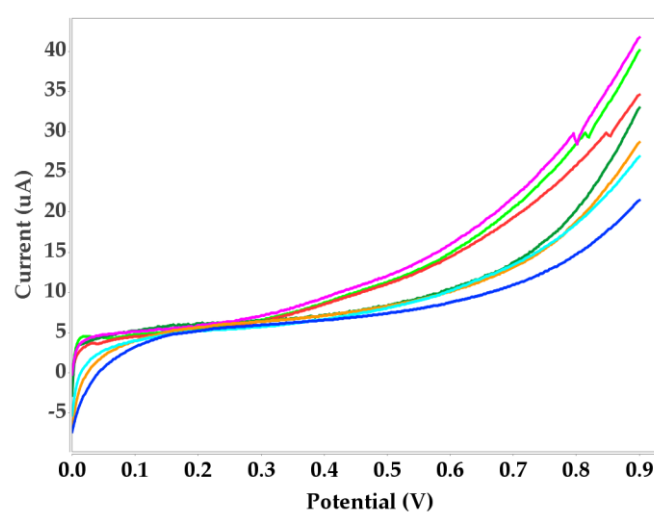

(e)

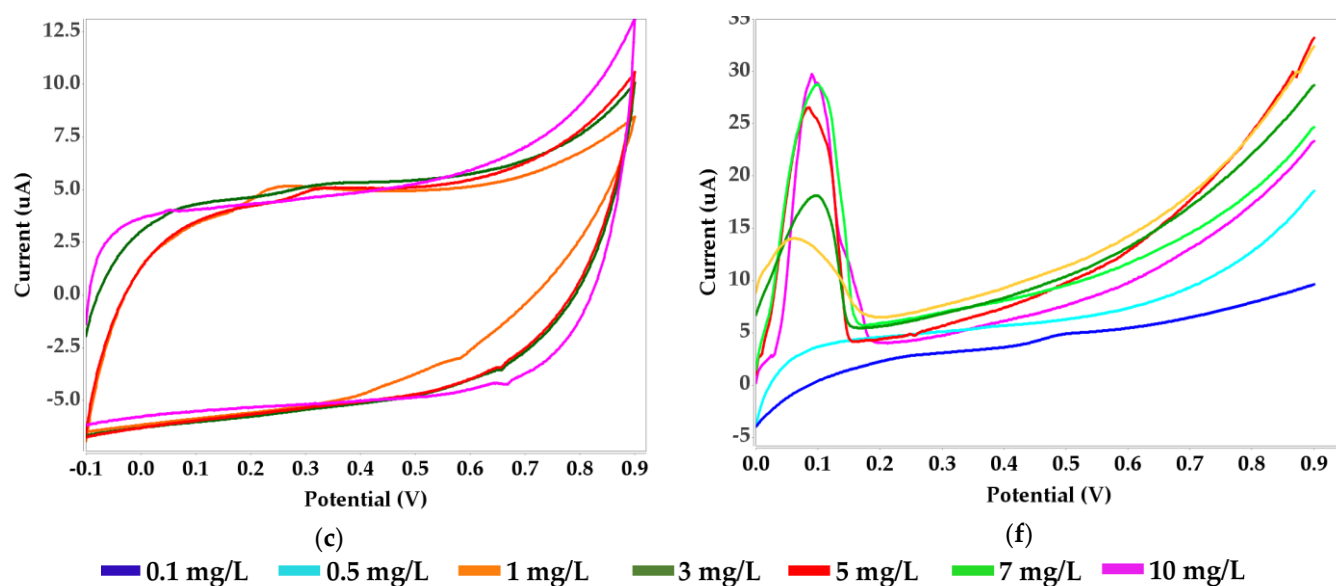

**Figure S1.** Voltammograms obtained for a nickel standard solution and Protein A-Agarose; Cyclic Voltammetry (CV) with Screen Printed Electrodes (SPEs) and (a) carbon, (b) bismuth, (c) silver; Linear Sweep Voltammetry (LSV) with SPEs and (d) carbon, (e) bismuth, (f) silver.

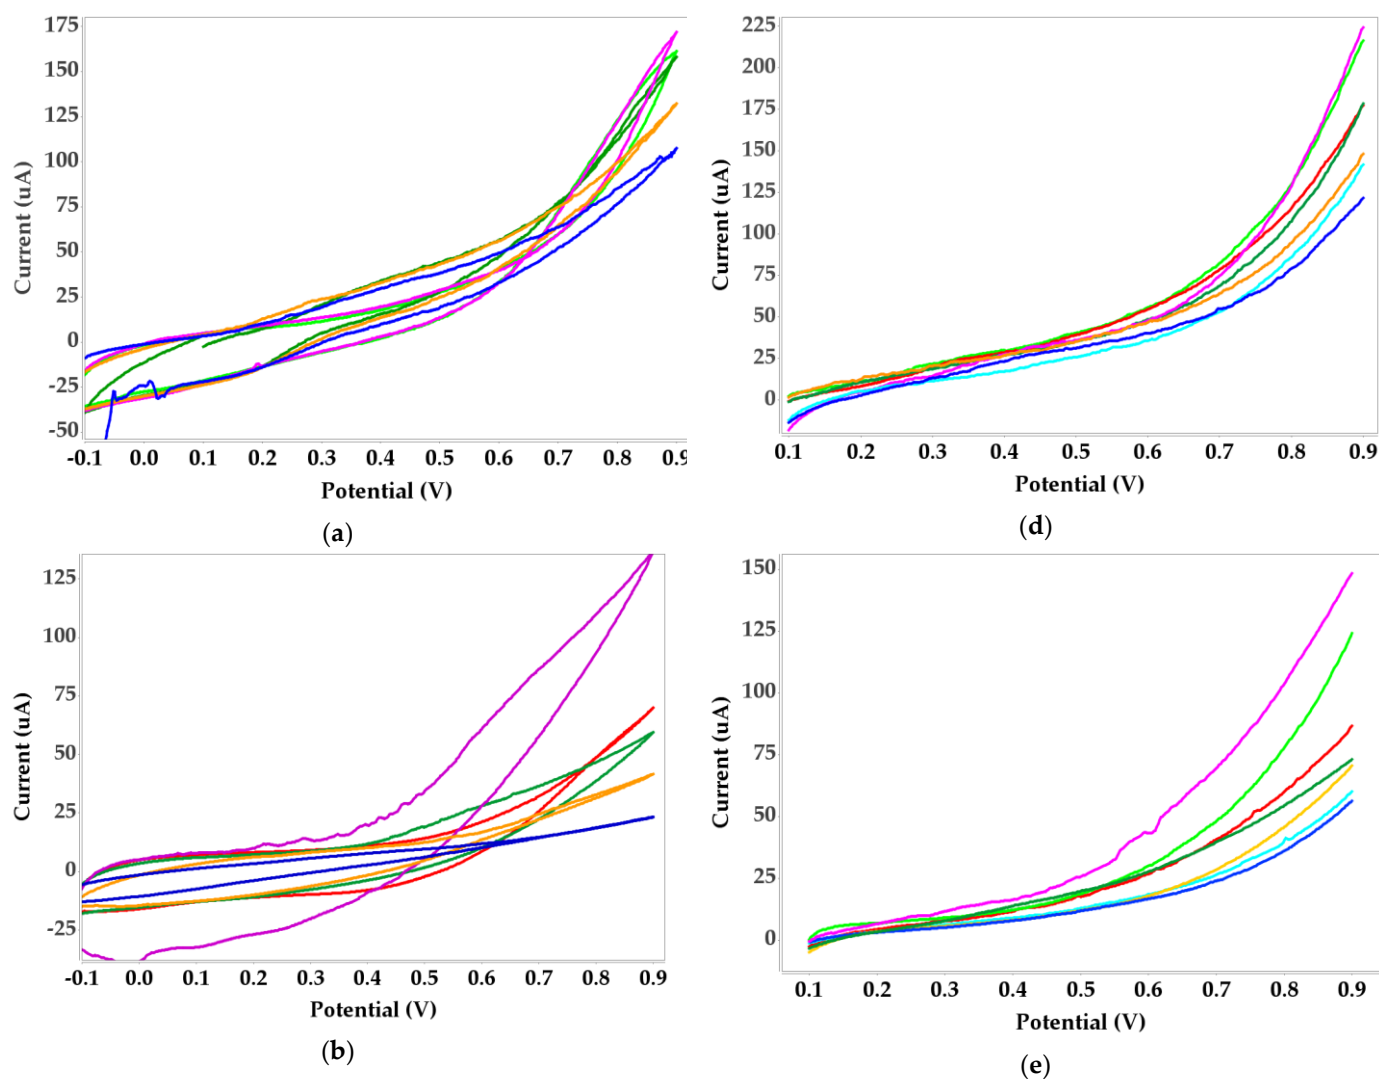

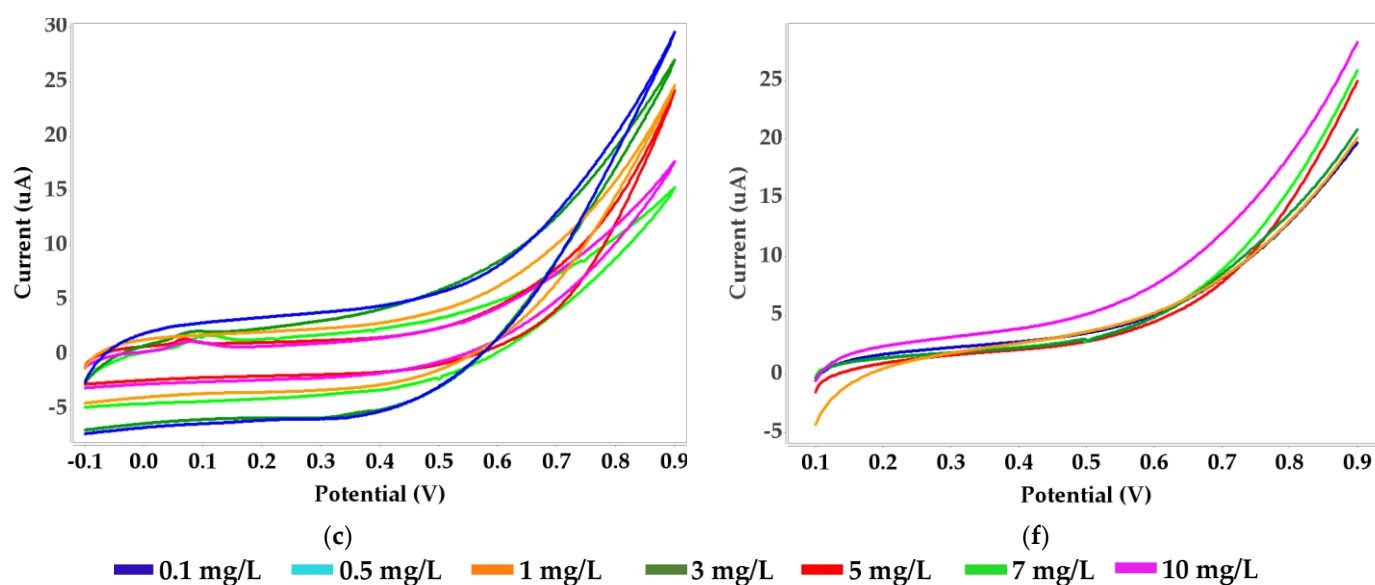

**Figure S2.** Voltammograms obtained for a nickel standard solution and dimethylglyoxime immobilized with benzophenone; CV with SPEs and (a) carbon, (b) bismuth, (c) silver; LSV with SPEs and (d) carbon, (e) bismuth, (f) silver.

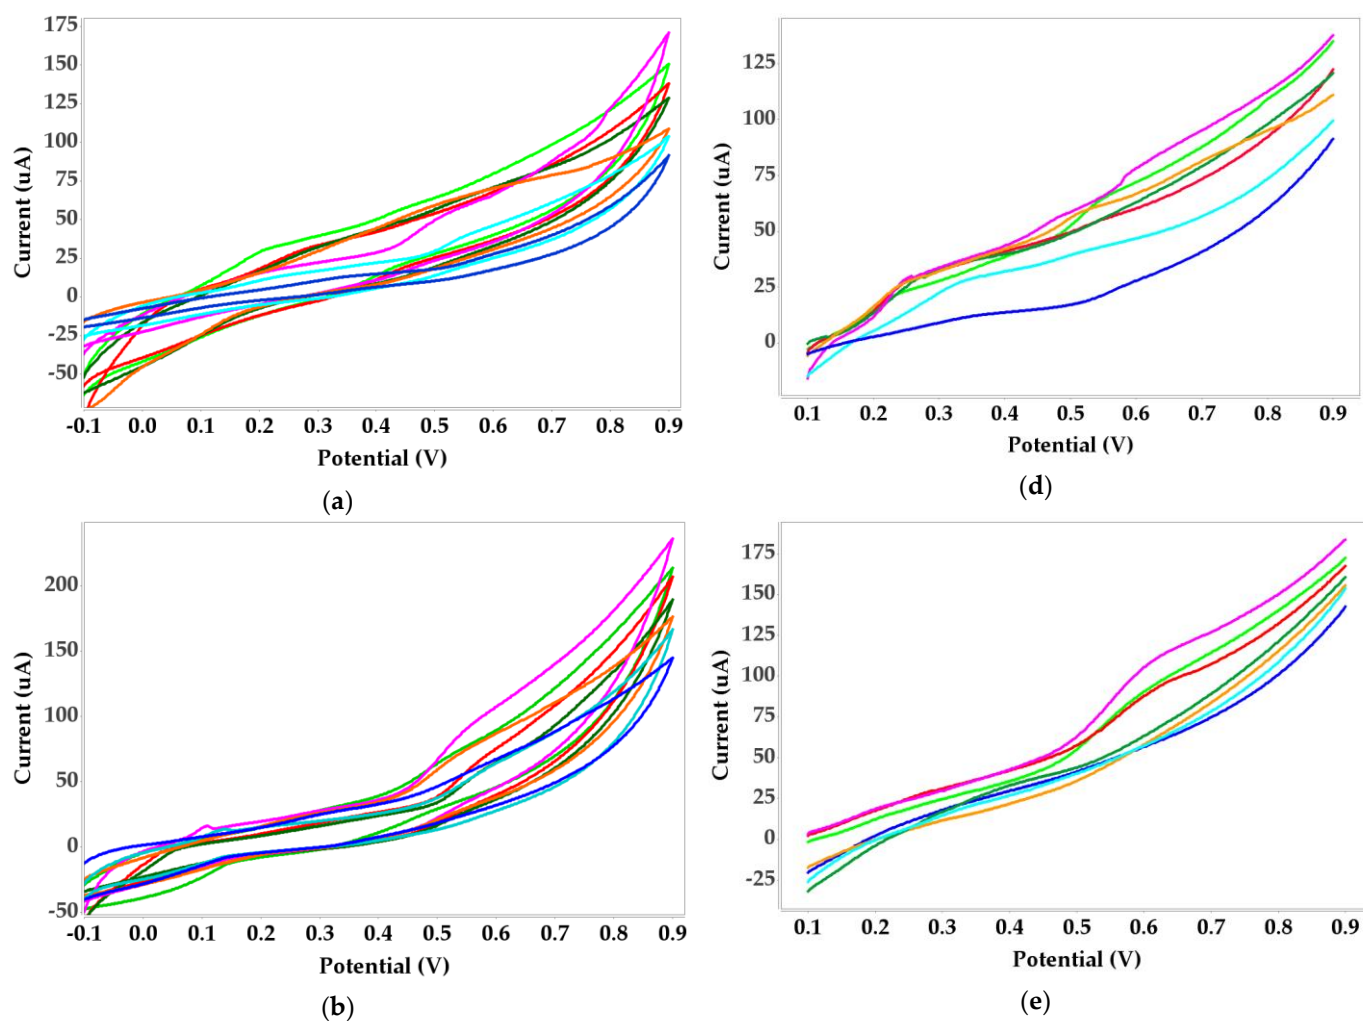

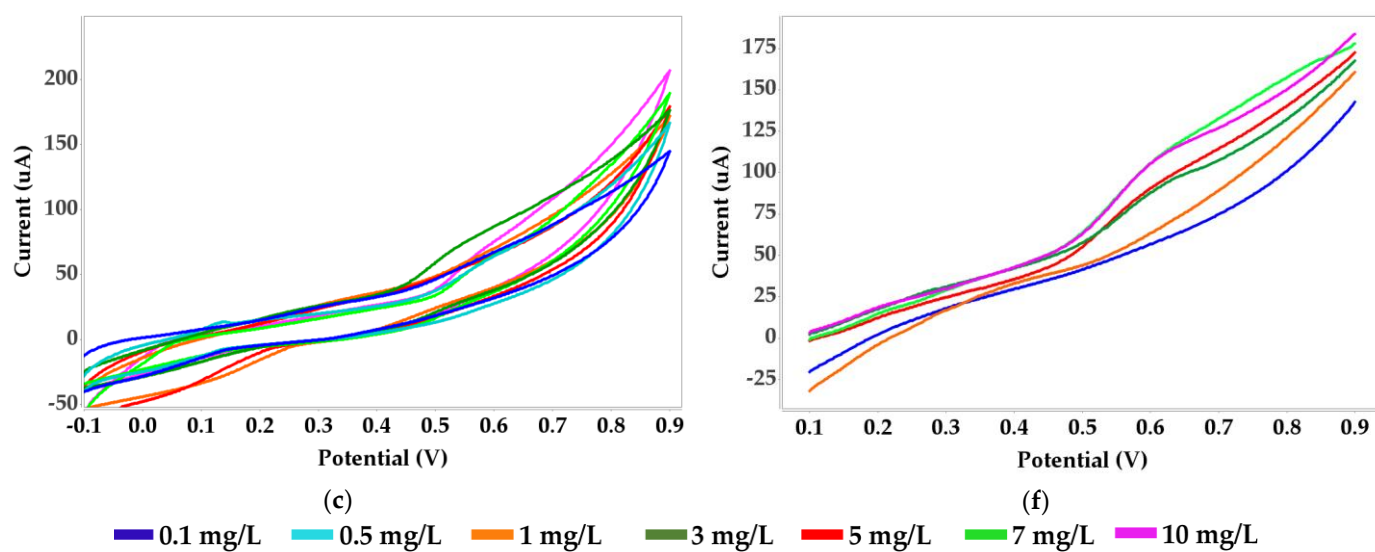

**Figure S3.** Voltammograms obtained for a nickel standard solution and ethylenediamine immobilized with alginate; CV with SPEs and (a) carbon, (b) bismuth, (c) silver; LSV with SPEs and (d) carbon, (e) bismuth, (f) silver.

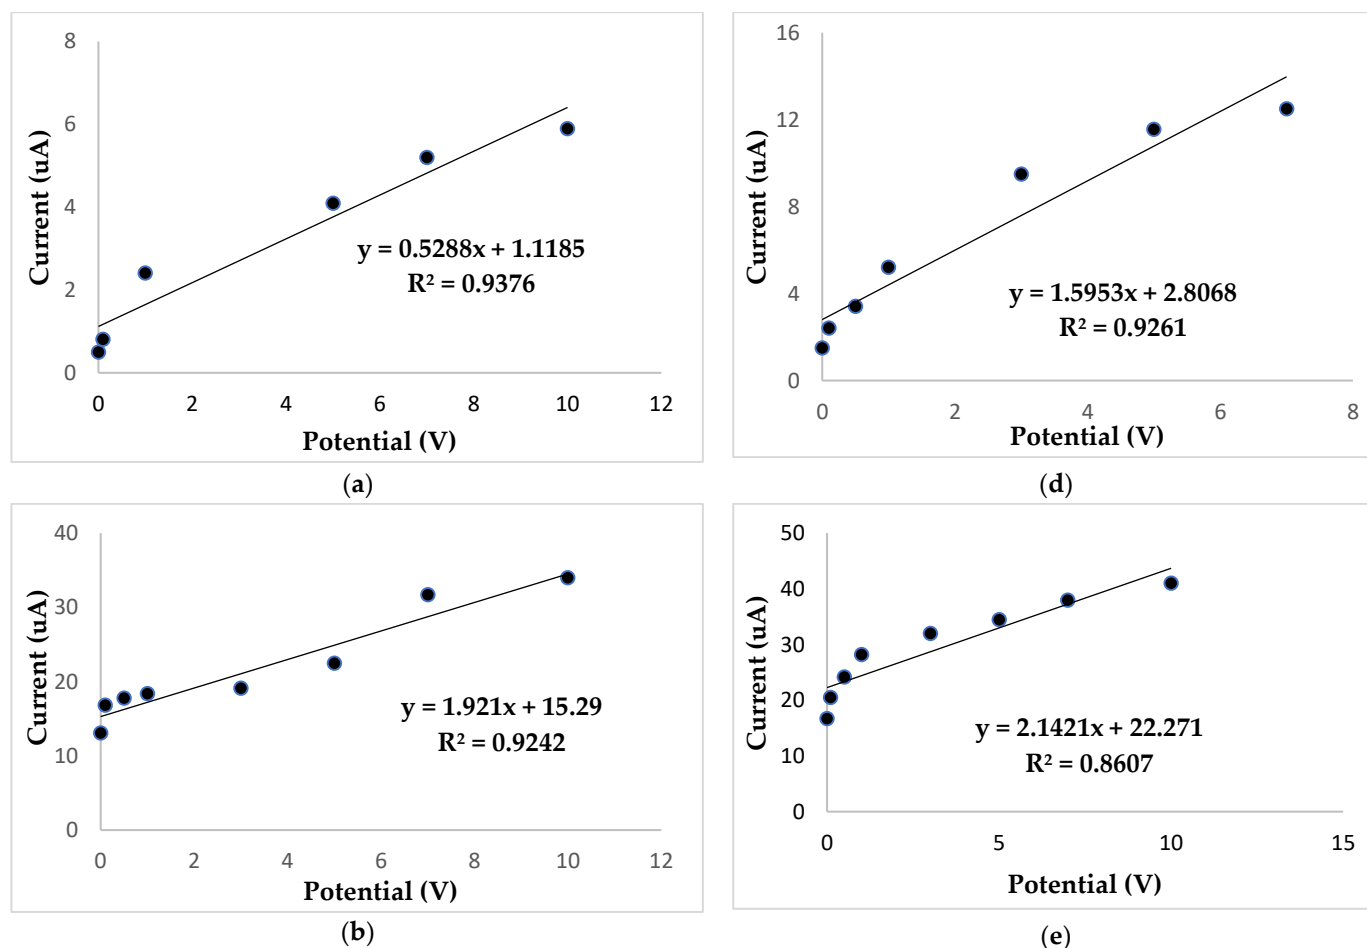

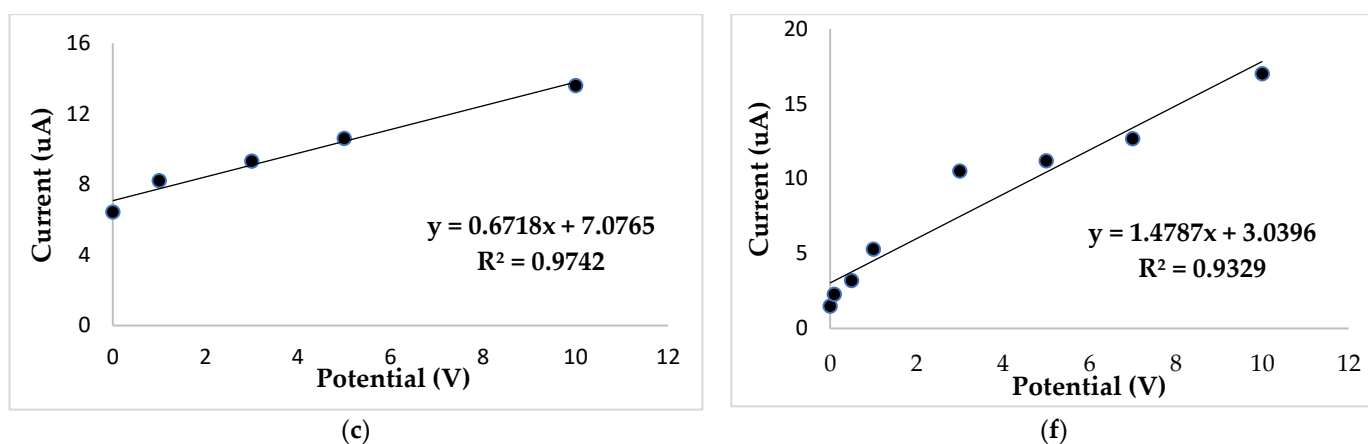

**Figure S4.** Calibration curves obtained for a nickel standard solution and Protein A-Agarose; CV with SPEs (a) carbon, (b) bismuth, (c) silver; LSV with SPEs (d) carbon, (e) bismuth, (f) silver.

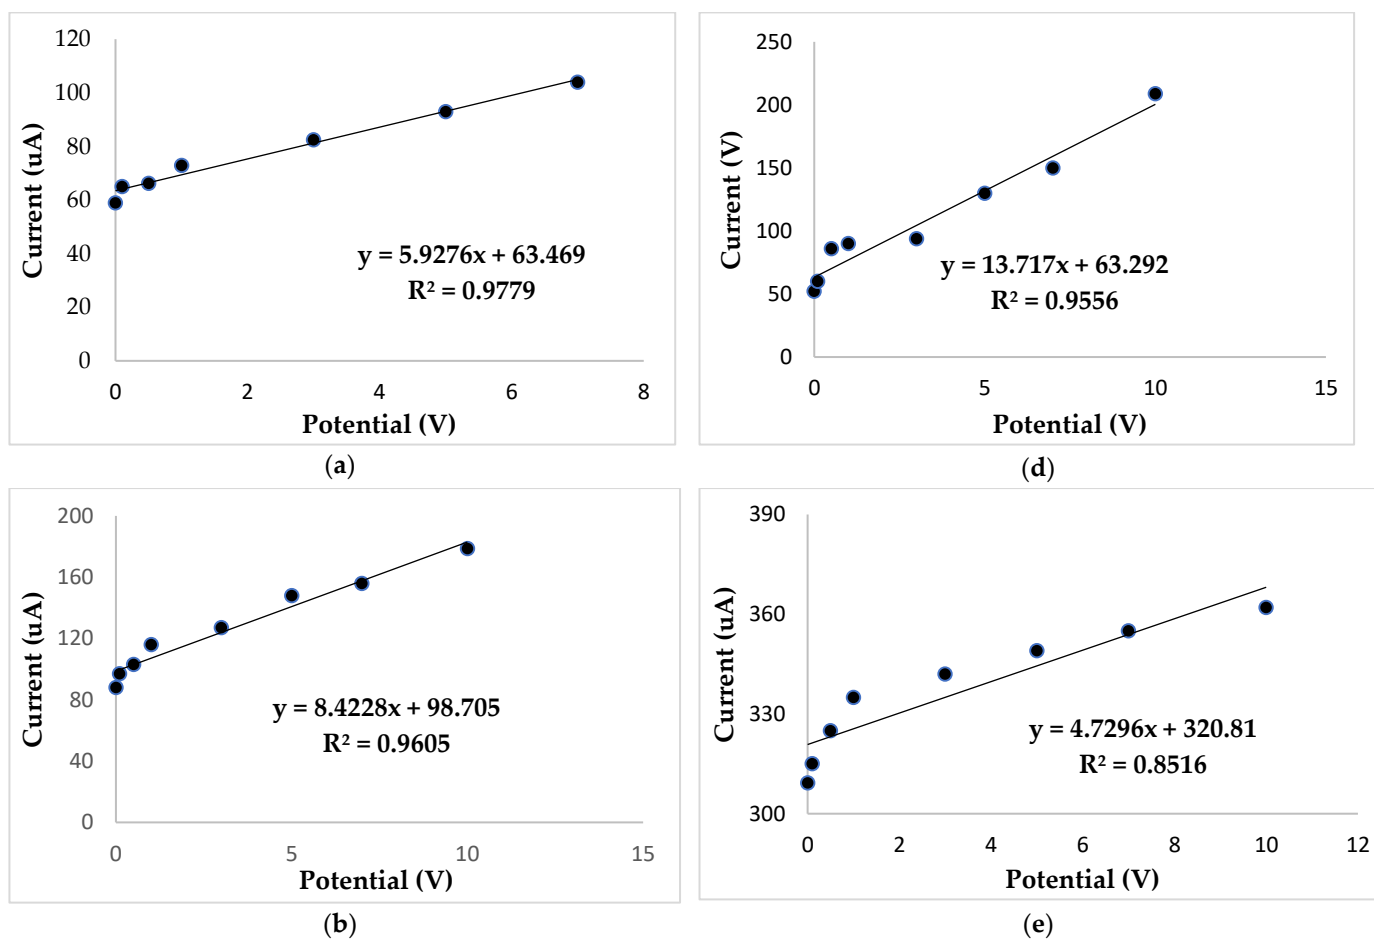

Figure in Main Text

(c)

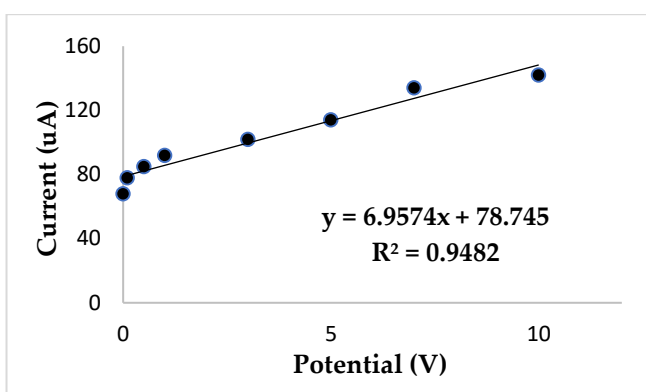

(f)

**Figure S5.** Calibration curves for a nickel standard solution and dimethylglyoxime immobilized with alginate (DMG-alginate); CV with SPEs (a) carbon, (b) bismuth, (c) silver (main text); LSV with SPEs (d) carbon, (e) bismuth, (f) silver.

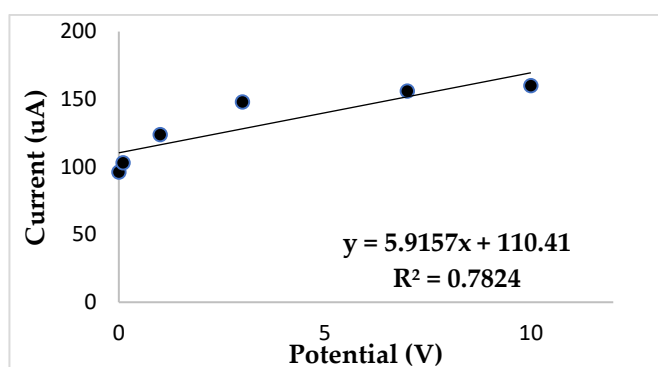

(a)

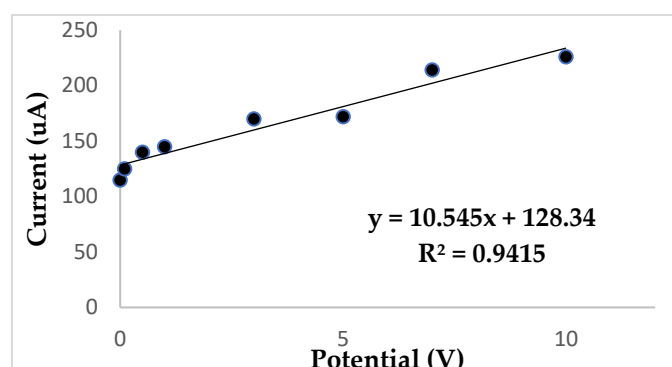

(d)

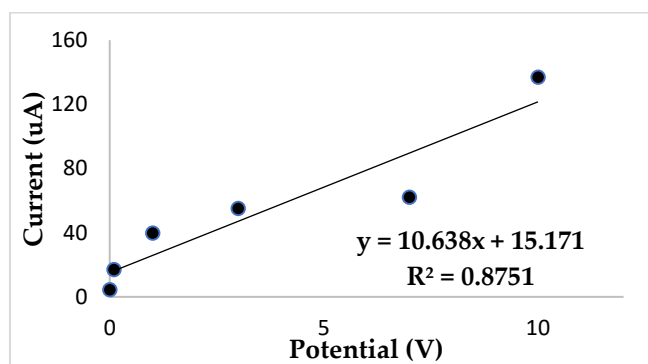

(b)

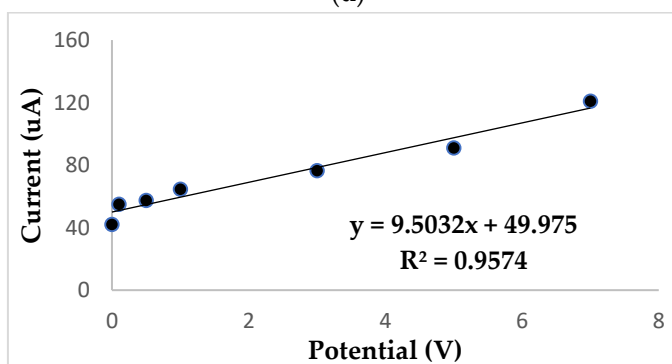

(e)

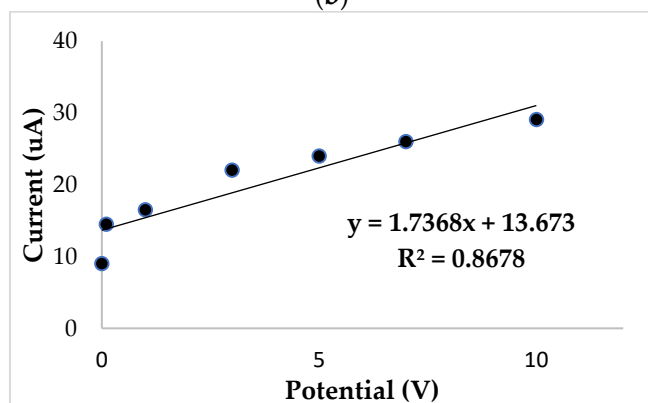

(c)

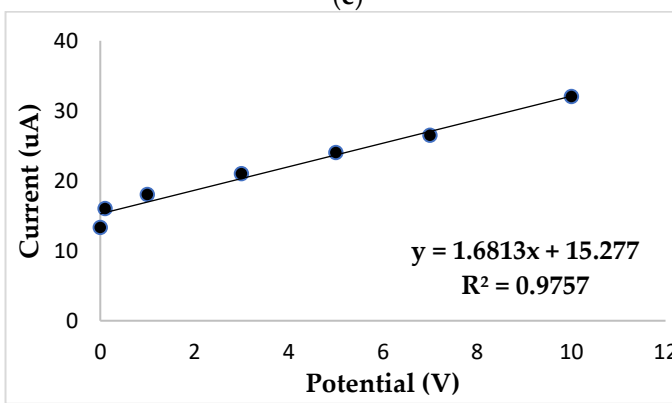

(f)

**Figure S6.** Calibration curves for a nickel standard solution and dimethylglyoxime immobilized with benzophenone; CV with SPEs (a) carbon, (b) bismuth, (c) silver; LSV with SPEs (d) carbon, (e) bismuth, (f) silver.

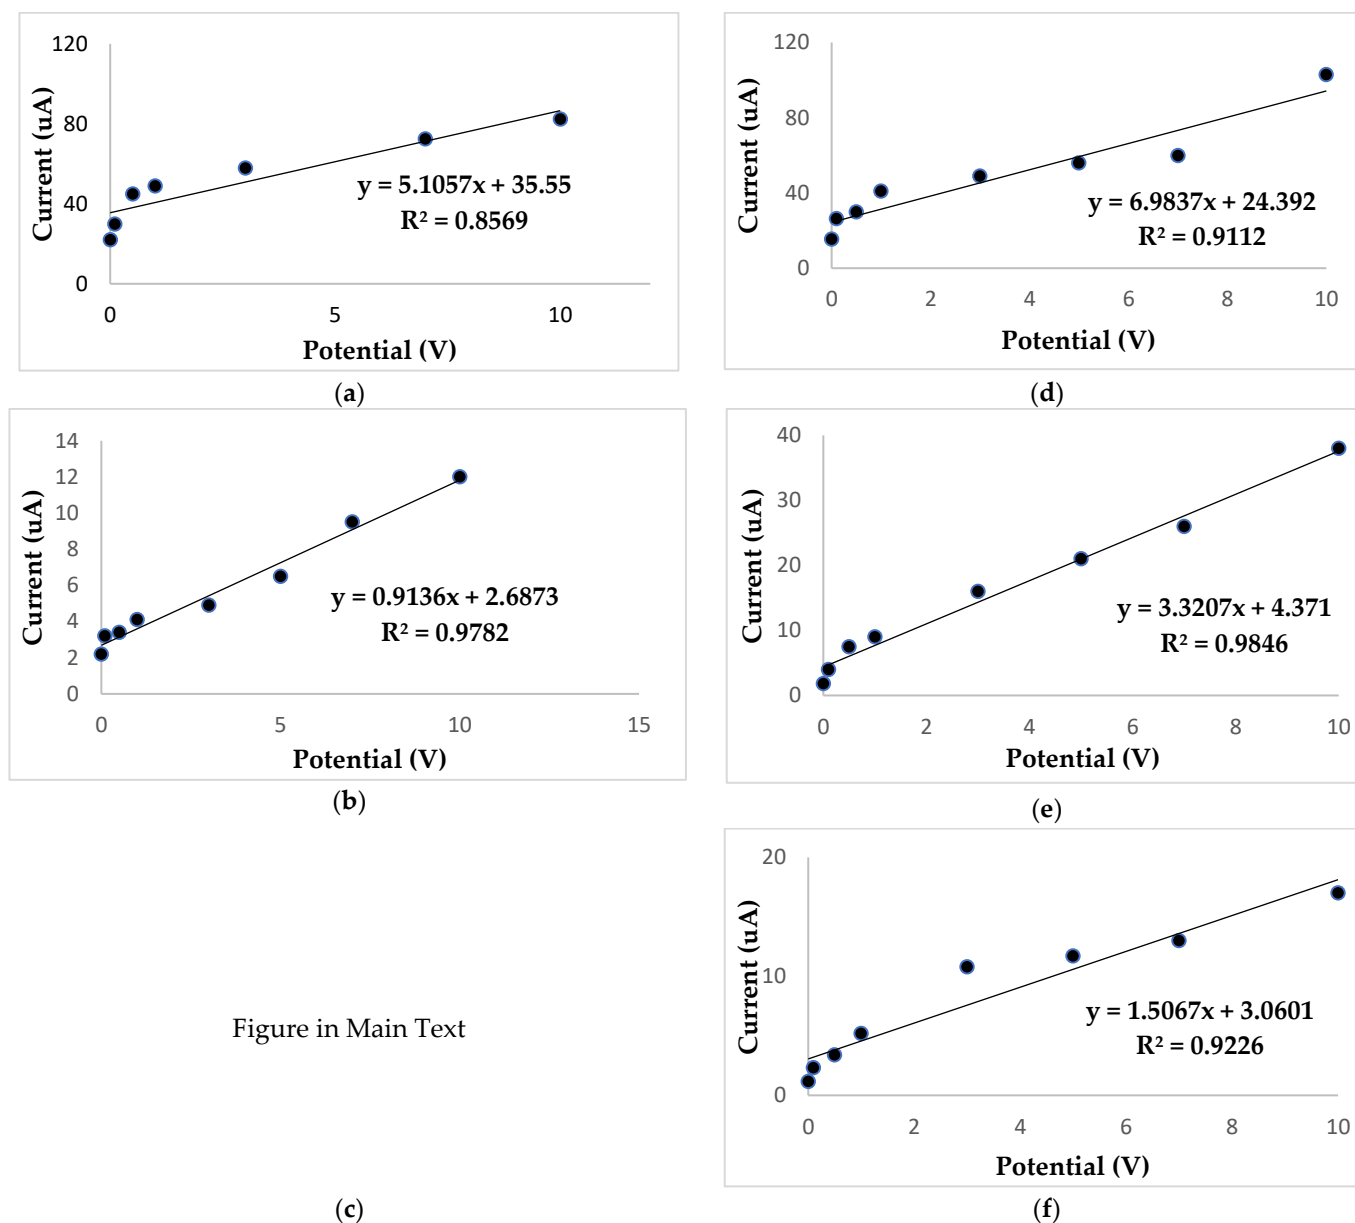

Figure in Main Text

**Figure S7.** Calibration curves for a nickel standard solution and urease immobilized with alginate; CV with SPEs (a) carbon, (b) bismuth, (c) silver (main text); LSV with SPEs (d) carbon, (e) bismuth, (f) silver.

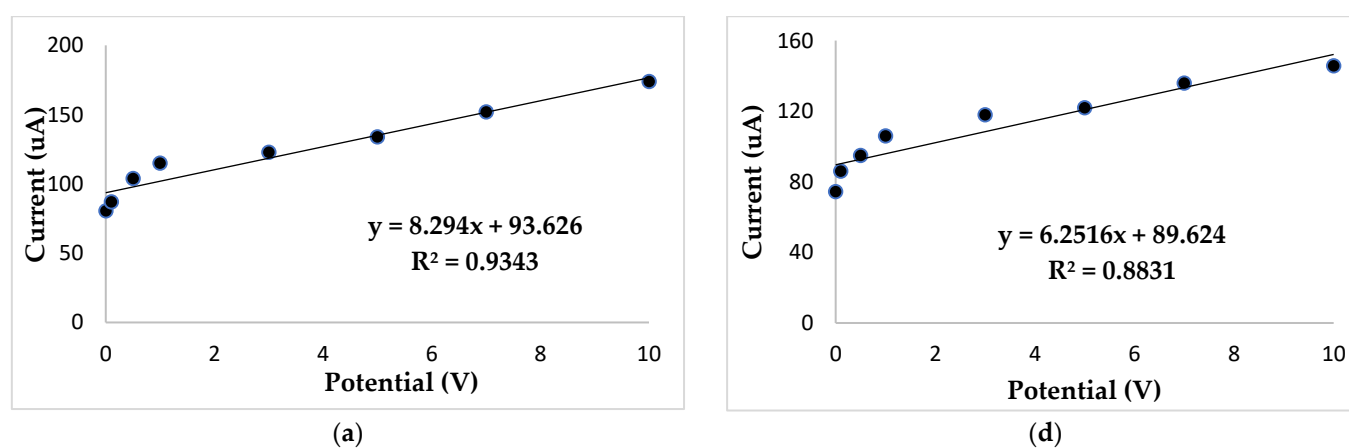

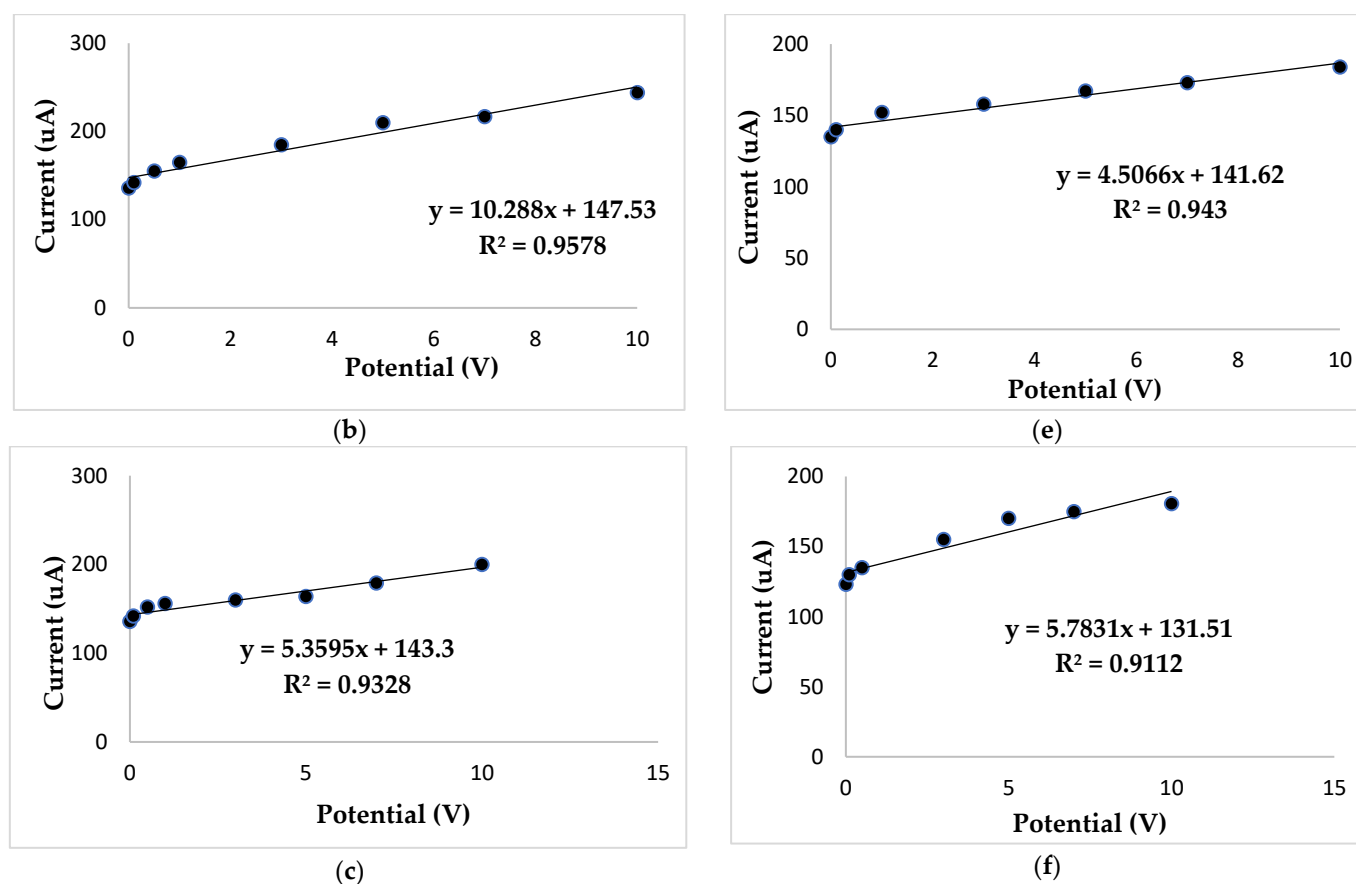

**Figure S8.** Calibration curves obtained for a nickel standard solution and ethylenediamine immobilized with alginate; CV with SPEs (a) carbon, (b) bismuth, (c) silver; LSV with SPEs (d) carbon, (e) bismuth, (f) silver.
